# Supplementary material for: Synthesis Product for Ocean Time Series (SPOTS) – a ship-based biogeochemical pilot
Source: Copernicus journal article supplement (doi:10.5194/essd-16-1901-2024), 2024-04-16
Supplement: Supplementary file 1 [file essd-16-1901-2024-supplement.zip]

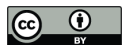

## *Supplement of*

# **Synthesis Product for Ocean Time Series (SPOTS) – a ship-based biogeochemical pilot**

**Nico Lange et al.**

*Correspondence to:* Toste Tanhua (ttanhua@geomar.de)

- `essd-16-1901-2024-supplement-title-page.pdf`
- `Supplement 10 Station_BP_evaluation_figures.zip.zip`
- `Supplementary Material Table Names.docx`
- `Table S1 MetaOverview.xlsx`
- `Table S2 Metadata_Template_BGCEOV_shipborn_timeseries.xlsx`
- `Table S3 Flag schemes.xlsx`
- `Table S4 TS_semantics.xlsx`
- `Table S5 QC methods.xlsx`
- `Table S6 ChangesinTSmethods.xlsx`
- `Table S7 Accuracy Method.xlsx`
- `Table S8 ProductVariables.xlsx`
- `Table S9 Method_Recommendations_Refs.xlsx`

The copyright of individual parts of the supplement might differ from the article licence.
